# Supplementary material
Source: Springer Nature journal article supplement (https://www.springermedizin.de/resource/supplementary/12985_2011_1544_MOESM8_ESM.pdf/9610044)

# Alignment of $\kappa$ B $\alpha$ Ank3 and Ank4 Helices

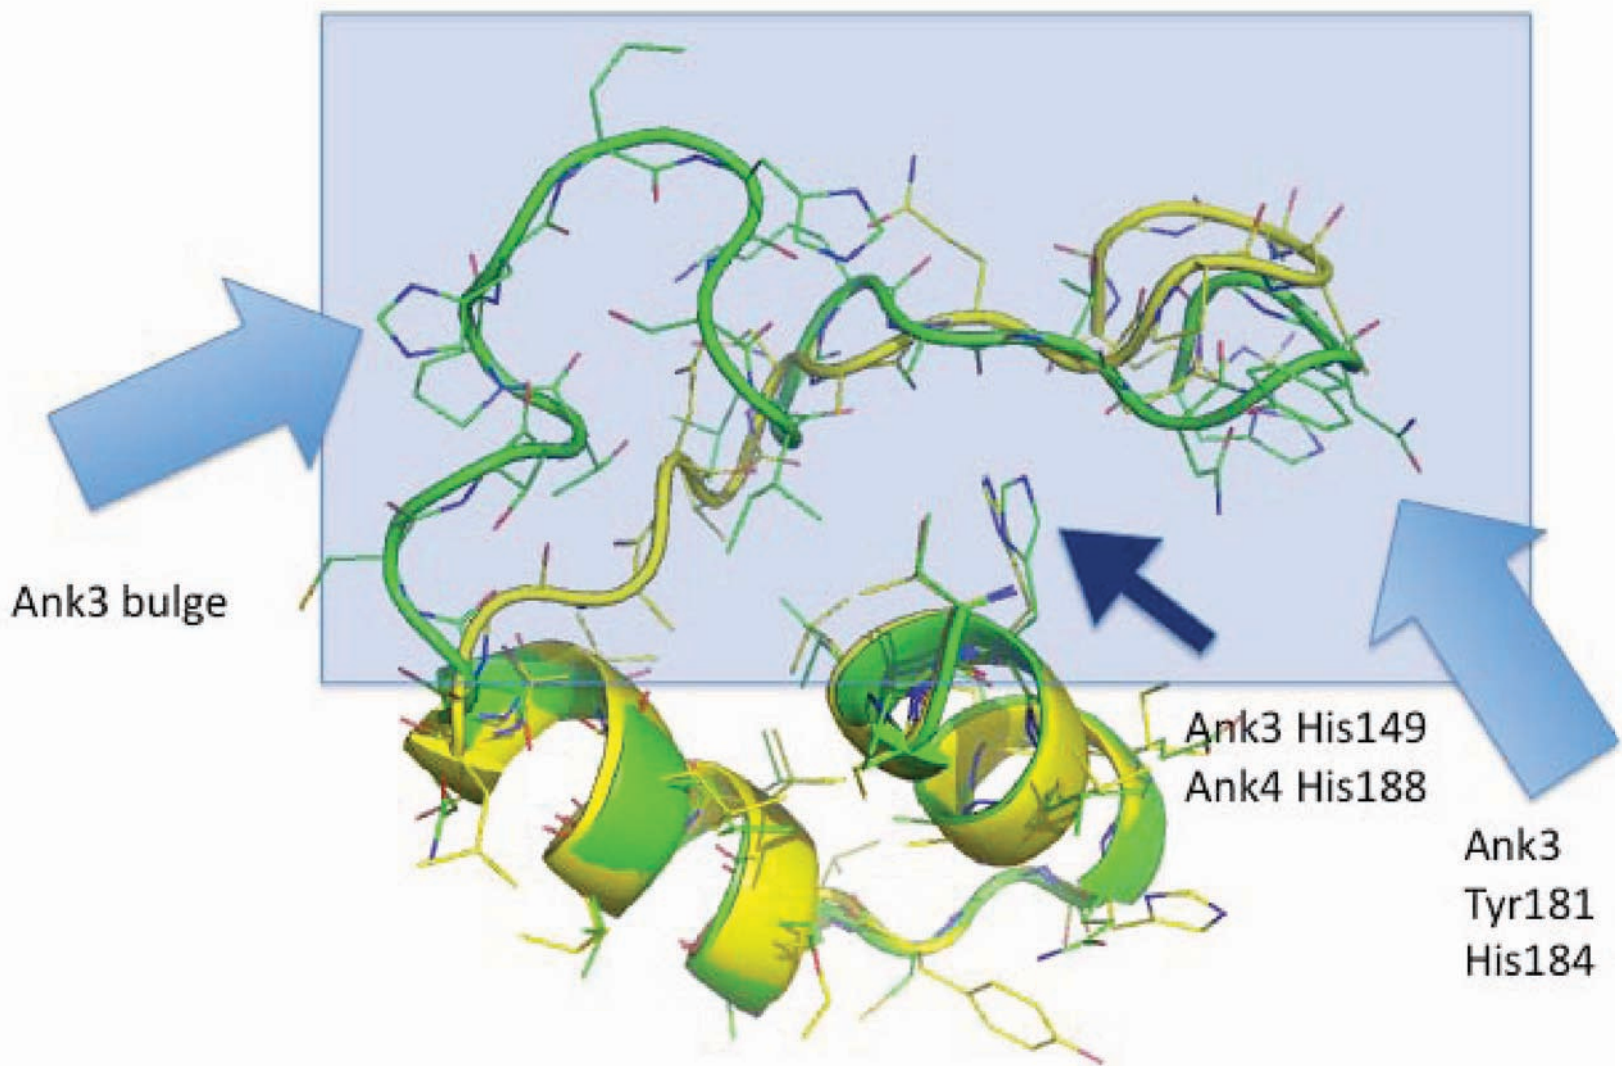

Supplement: MOESM8 [file 9610044]
